# Supplementary material for: Oncogenic Role of HMGB1 as An Alarming in Robust Prediction of Immunotherapy Response in Colorectal Cancer
Source: MDPI journal article supplement (doi:10.3390/cancers14194875), 2022-10-05
Supplement: s1 [file s1]

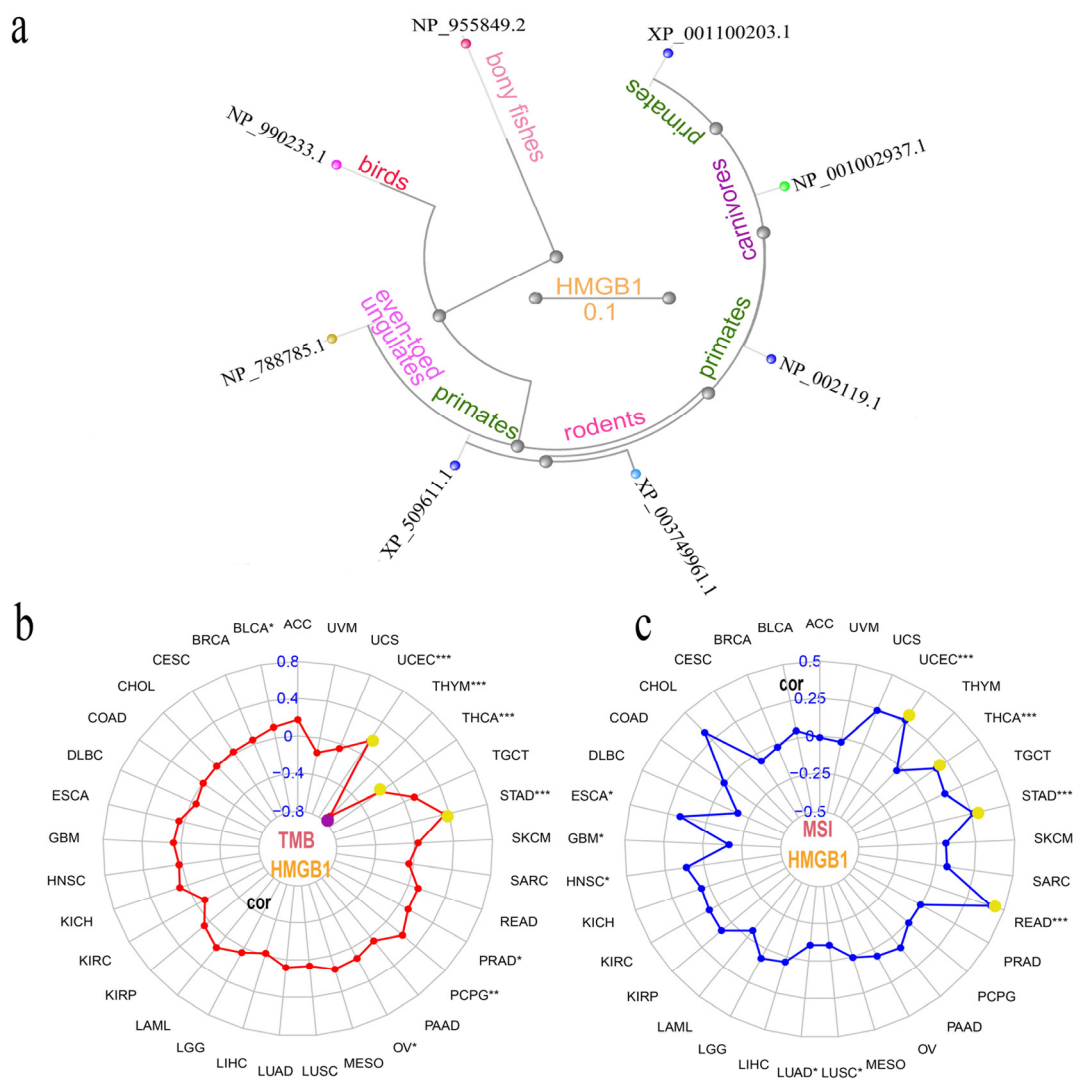

**Figure S3.** (a) HMGB1-related phylogenetic tree, (b) the potential correlation of HMGB1 (c) TMB/MSI. The  $p$ -value is given. The partial correlation (cor) values of  $\pm 0.8$  (TMB) and  $\pm 0.5$  (MSI) are marked. \*  $p < 0.05$ ; \*\*  $p < 0.01$ ; \*\*\*  $p < 0.001$ .

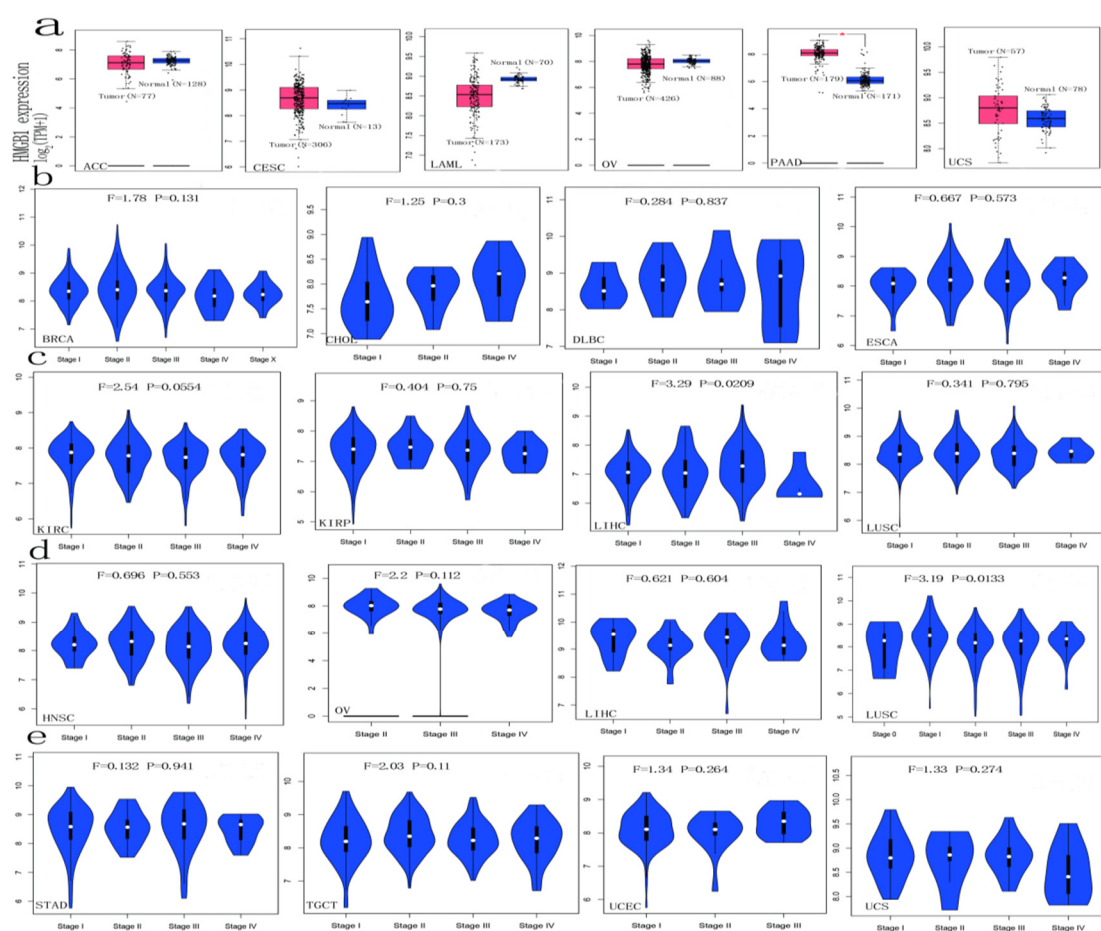

**Figure S4.** HMGB1 expression in certain cancers and pathological stages. (a) The box plots of HMGB1-related expression statuses in ACC, CESC, LAML, OV, PAAD, and UCS in TCGA database in normal tissues of the GTEx databases. (b) The violin plots of HMGB1 expression in different pathological stages of BRCA, CHOL, DLBC, ESCA (c) KIRC, KIRP, LIHC, LUSC (d) HNSC, OV, READ, SKCM (e) STAD, TGCT, UCEC, UCS.

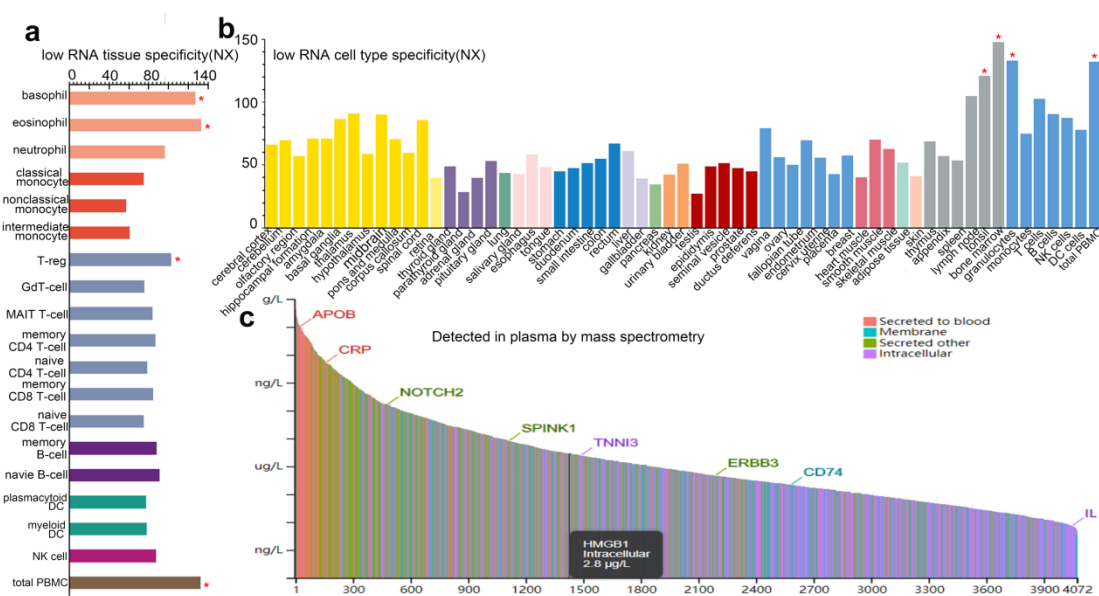

**Figure S5.** HMGB1 expression in different cell types, tissues and plasma in the normal physiological state. (a) The diagram of HMGB1 expression in different tissues via the consensus datasets of HPA, GTEx and FANTOM5 (b) The diagram of HMGB1 expression in different tissues or blood

cells via the consensus dataset of HPA, Monaco and Schmiedel. (c) The diagram of HMGB1 gene in different tissues via the data of mass spectrometry.

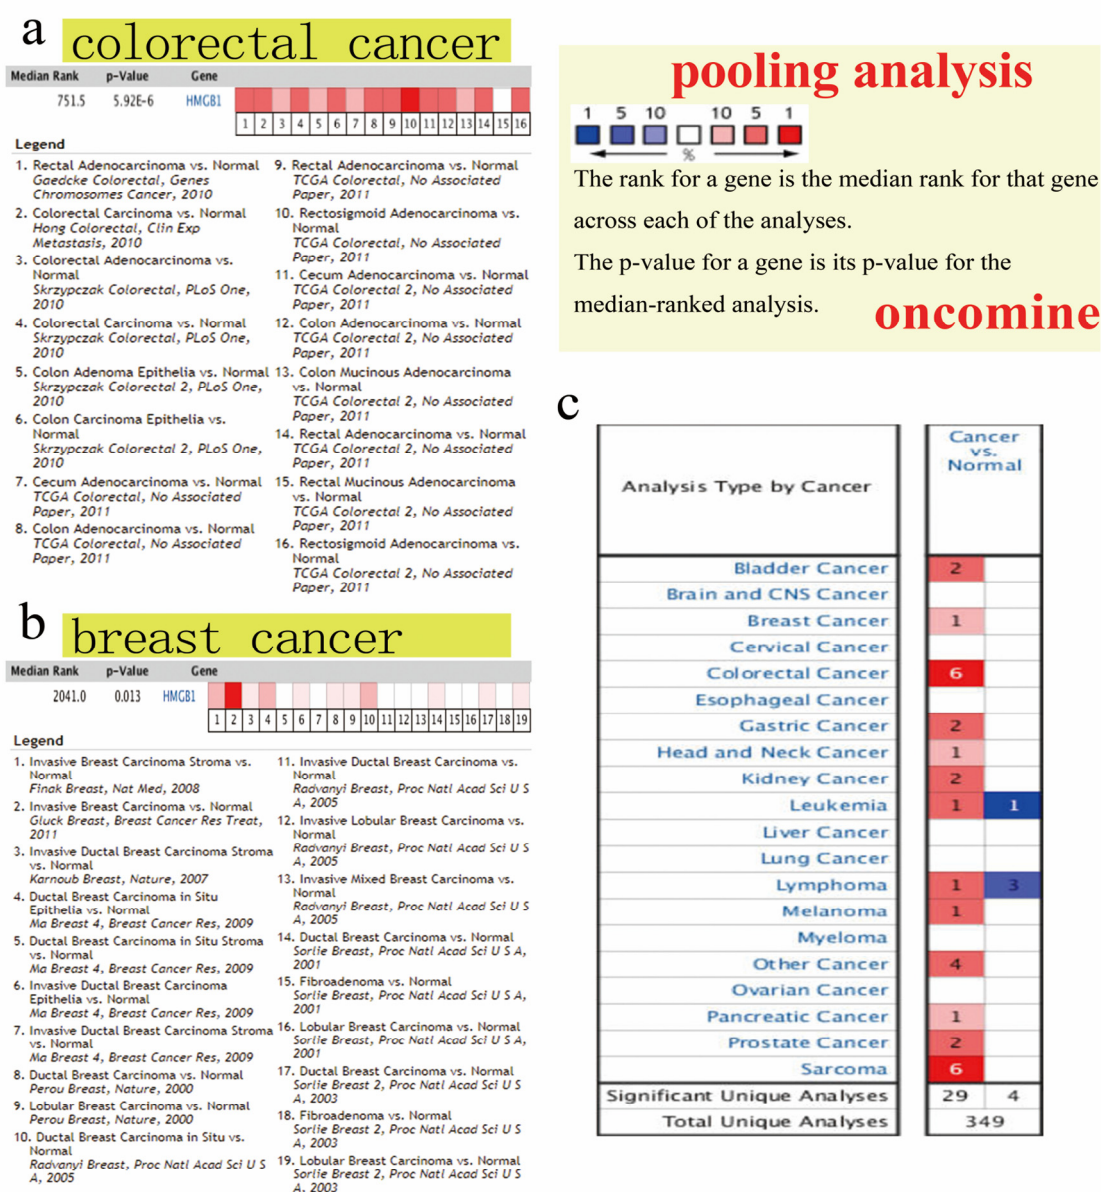

**Figure S6.** HMGB1 expression difference between normal and tumor tissues to pool the analysis via the Oncomine database. (a) Colorectal cancer (b) breast cancer (c) the analysis of HMGB1 expression with tumorous types.



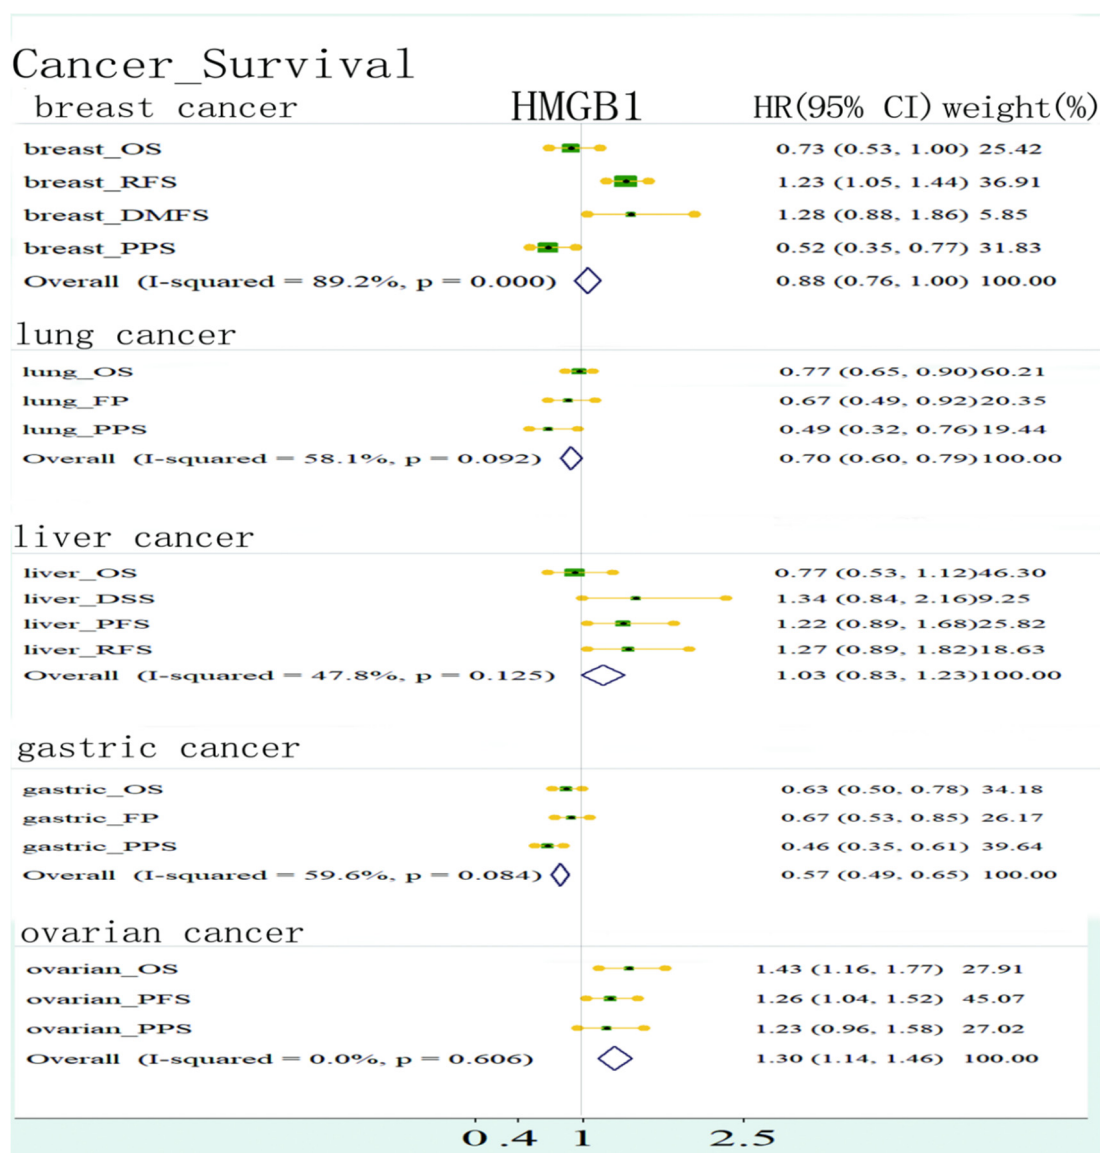

**Figure S7.** HMGB1 expression and prognosis of cancers via the Kaplan-Meier plotter. The HMGB1-related survival analyses of OS, DMFS, RFS, PFS, PPS, FP, and DSS in breast cancer, ovarian cancer, liver cancer, gastric cancer and lung cancer.

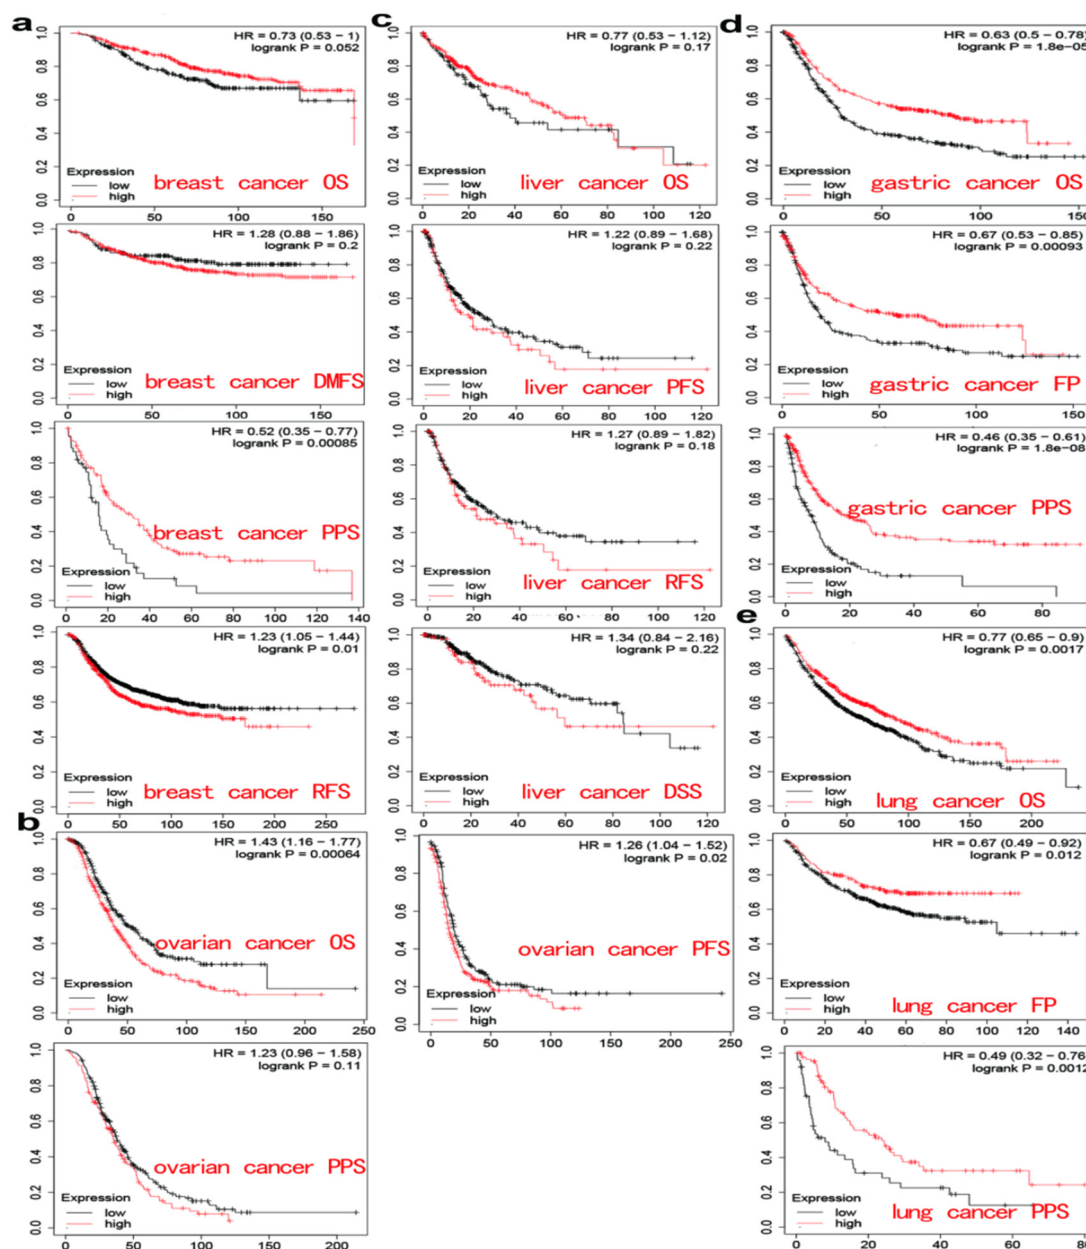

**Figure S8.** Meta-analysis on the correlation between HMGB1 expression and cancer prognosis. (a) breast cancer, (b) ovarian cancer, (c) liver cancer, (d) gastric cancer, and (e) lung cancer cases.

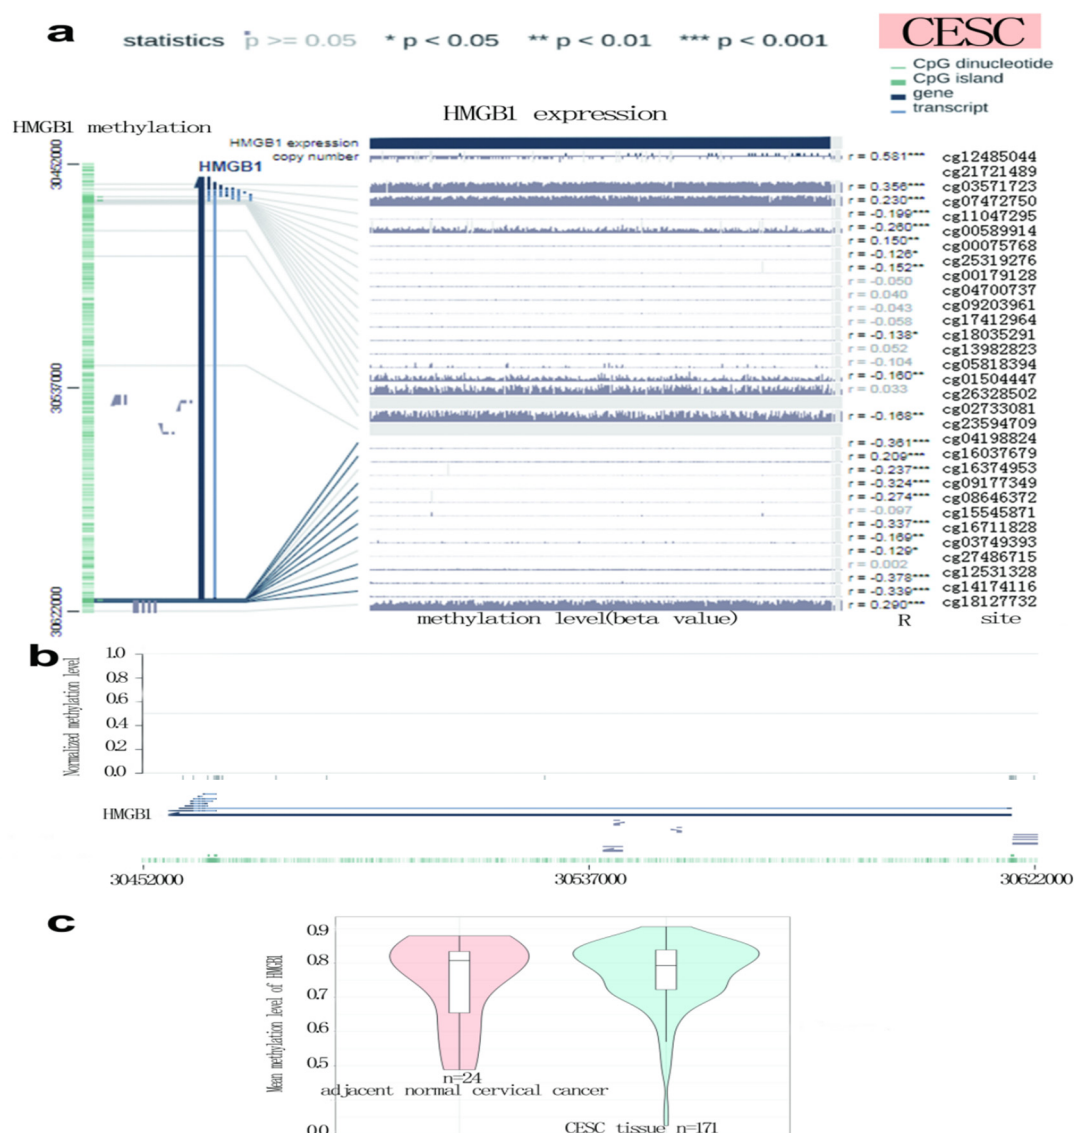

**Figure S9.** HMGB1-related DNA methylation and gene expression for the CESC cases of TCGA. (a) The diagram of HMGB1 relative multiple probes DNA methylation level via the MEXPRESS. The promoter region probes are highlighted. The beta value of methylation, the Benjamini-Hochberg-adjusted  $p$ -value and the Pearson correlation coefficients ( $R$ ) are displayed. (b) Normalization of chip data (c) The violin plot of main methylation level of HMGB1 in the CESC tissues ( $n = 171$ ) and adjacent normal tissues ( $n = 24$ ).

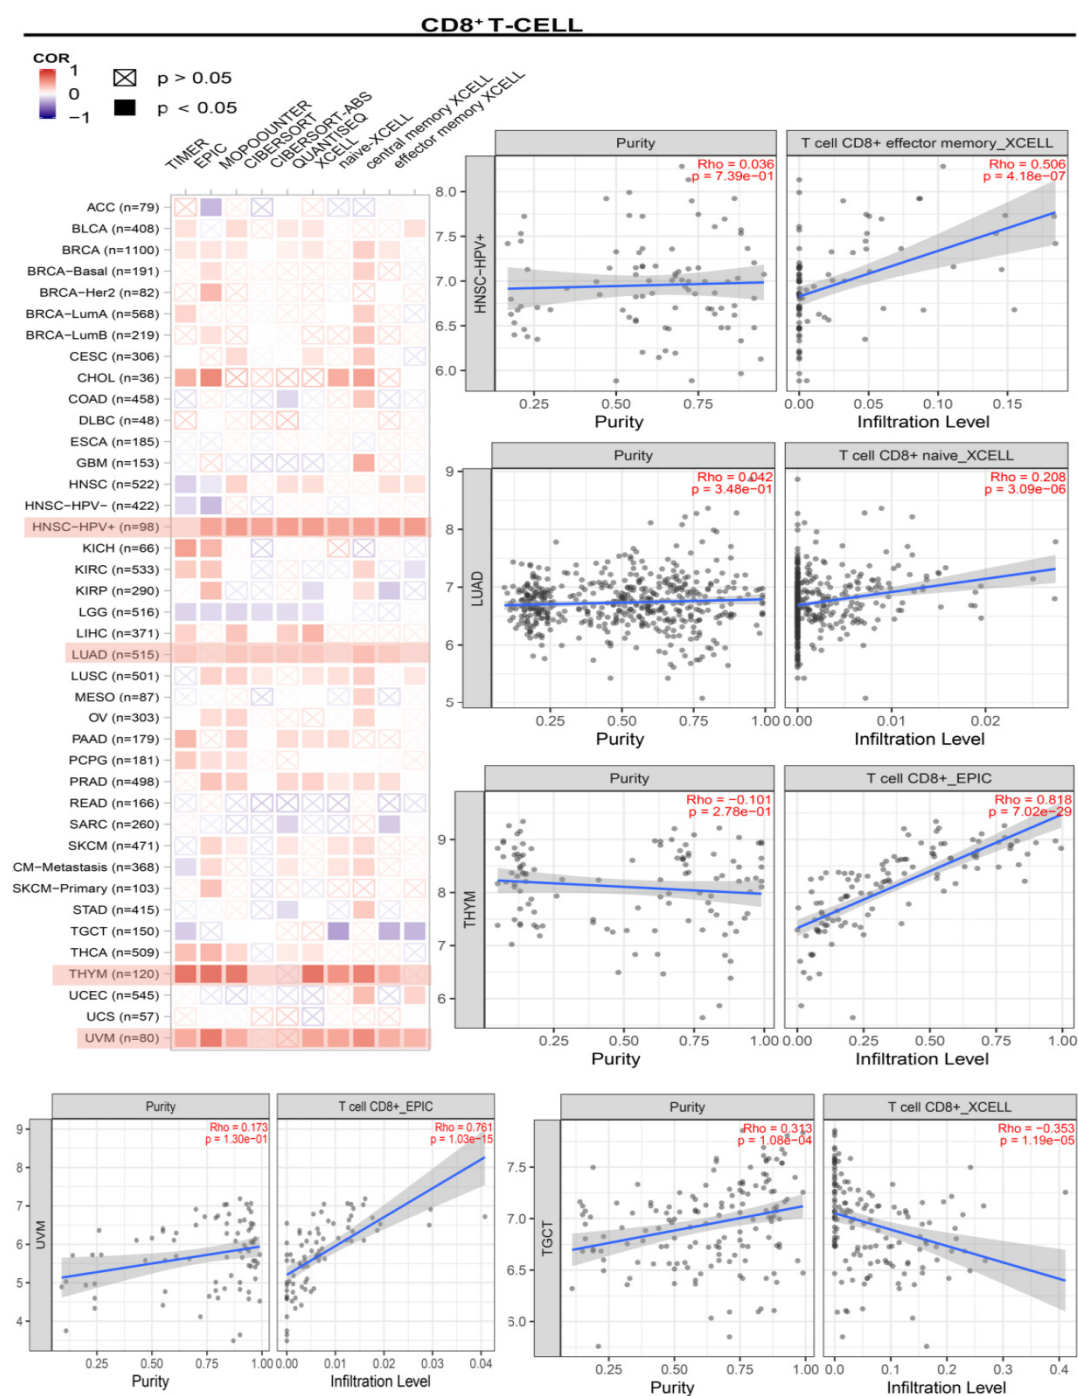

**Figure S10.** Correlation analysis between HMGB1 expression and immune infiltration of CD8<sup>+</sup> T-cells in TCGA via different algorithms.



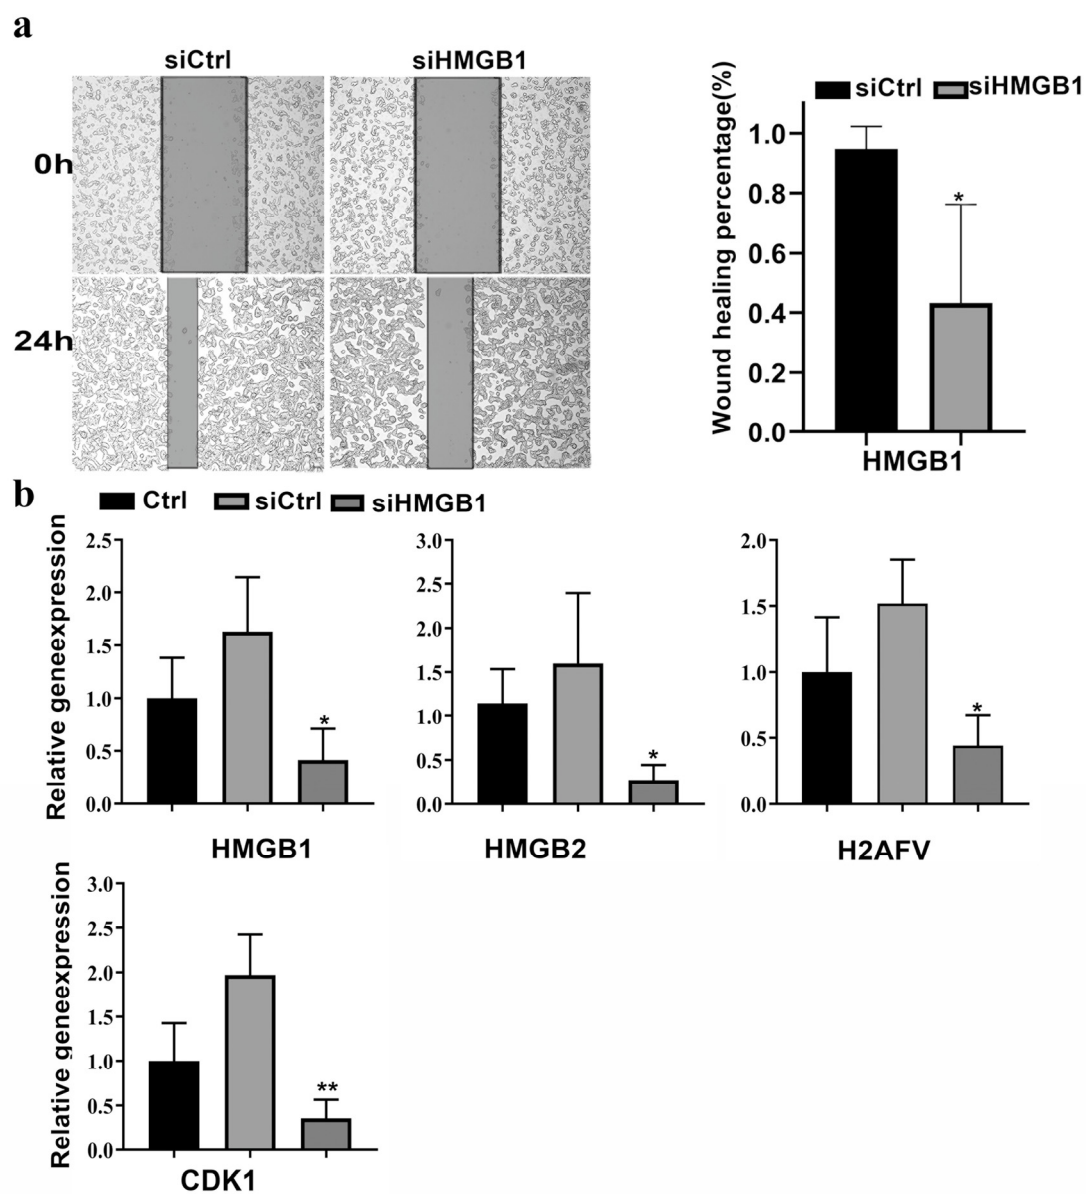

**Figure S11.** Functional validation of HMGB1 and expression of related in SW480 cell line. (a) Migration of SW480 cells assessed by wound healing assays. (b) HMGB1 knockdown reduces expression of its related gene including HMGB2, H2AFV, and CDK1 in SW480 cell line at gene expression level based on real time quantitative reverse transcriptase PCR (RT-qPCR).

**Table S1.** Correlative subgroup analysis of HMGB1 expression and prognosis of breast cancer cases.

| Factor            | subgroup                  | Sample size | OS   |               | RFS  |               | DMFS |              |
|-------------------|---------------------------|-------------|------|---------------|------|---------------|------|--------------|
|                   |                           |             | HR   | <i>p</i>      | HR   | <i>p</i>      | HR   | <i>p</i>     |
| ER status         | ER positive               | 2565        | 0.29 | <b>0.014</b>  | 1.5  | <b>0.0092</b> | 0.47 | 0.1          |
|                   | ER negative               | 1214        | 0.5  | 0.057         | 0.76 | 0.12          | 0.2  | <b>0.015</b> |
| TP53 status       | Mutated                   | 232         | 0.61 | 0.48          | 1.73 | 0.075         | 2.71 | 0.055        |
|                   | Wild type                 | 363         | NA   | NA            | 0.32 | <b>0.0082</b> | NA   | NA           |
| PR status         | PR positive               | 954         | NA   | NA            | 0.71 | 0.09          | 0.4  | 0.11         |
|                   | PR negative               | 1028        | NA   | NA            | 0.68 | <b>0.039</b>  | 0.48 | 0.054        |
| HER2 status       | HER2 positive             | 416         | 5.36 | <b>0.0077</b> | 0.56 | <b>0.034</b>  | 0.31 | <b>0.031</b> |
|                   | HER2 negative             | 1456        | 0.34 | 0.087         | 1.63 | <b>0.0024</b> | 0.26 | <b>0.023</b> |
| Grade             | Grade1                    | 378         | 0    | <b>0.031</b>  | 3.15 | 0.11          | NA   | NA           |
|                   | Grade2                    | 1077        | 1.81 | 0.33          | 1.39 | 0.22          | 2.05 | 0.16         |
|                   | Grade3                    | 1090        | 0.64 | 0.09          | 1.46 | <b>0.019</b>  | 1.69 | 0.087        |
|                   | Basal                     | 879         | 1.33 | 0.39          | 1.42 | <b>0.045</b>  | 2.1  | <b>0.035</b> |
| Intrinsic subtype | LuminalA                  | 2504        | 0.54 | <b>0.021</b>  | 1.21 | 0.14          | 1.46 | 0.25         |
|                   | LuminalB                  | 1425        | 0.51 | <b>0.047</b>  | 1.56 | <b>0.0048</b> | 1.65 | 0.14         |
|                   | HER2 <sup>+</sup>         | 335         | 0.68 | 0.4           | 0.7  | 0.21          | 0.58 | 0.16         |
| Lymph node status | Lymph node positive       | 1459        | 0.56 | 0.084         | 0.74 | <b>0.024</b>  | 0.59 | 0.093        |
|                   | Lymph node negative       | 2259        | 2.11 | 0.13          | 1.71 | <b>0.0064</b> | 2.39 | <b>0.044</b> |
| Pietenpol subtype | Basal-like1               | 239         | NA   | 0.14          | 1.87 | <b>0.035</b>  | 6.14 | <b>0.014</b> |
|                   | Basal-like2               | 97          | NA   | <b>0.029</b>  | 3.81 | <b>0.021</b>  | 4.62 | 0.11         |
|                   | immunomodulatory          | 290         | 2.75 | 0.14          | 0.61 | 0.23          | 0.47 | 0.29         |
|                   | Mesenchymal               | 229         | 2.67 | 0.18          | 2.25 | <b>0.018</b>  | 2.37 | 0.15         |
|                   | Luminal androgen receptor | 276         | 0.36 | <b>0.04</b>   | 0.68 | 0.24          | 0.35 | <b>0.048</b> |

HR, hazard ratio; OS, overall survival; RFS, relapse free survival; DMFS, distant metastasis free survival; ER, Estrogen receptor; PR, Progesterone receptor; HER2, human epidermal growth factor receptor-2; TP53, Tumor Protein P53; NA, not available data value less than 0.05 is shown in bold.

**Table S2.** Correlative subgroup analysis of HMGB1 expression and prognosis of lung cancer cases.

| FACTOR          | subgroup                       | Sample size | OS   |                | FP   |                | PPS  |               |
|-----------------|--------------------------------|-------------|------|----------------|------|----------------|------|---------------|
|                 |                                |             | HR   | <i>p</i>       | HR   | <i>p</i>       | HR   | <i>p</i>      |
| Histology       | adenocarcinoma                 | 865         | 0.54 | <b>7.1e−07</b> | 0.53 | <b>8.4e−05</b> | 0.48 | <b>0.0031</b> |
|                 | Squamous cell carcinoma        | 675         | 1.34 | 0.065          | 2.69 | <b>0.00026</b> | 2.06 | 0.26          |
| Stage           | Stage I                        | 652         | 0.49 | 3.5e−05        | 0.5  | <b>0.0054</b>  | 0.32 | <b>7e−04</b>  |
|                 | Stage II                       | 320         | 0.65 | 0.13           | 1.97 | <b>0.042</b>   | 0.47 | <b>0.03</b>   |
|                 | Stage III                      | 70          | 1.68 | 0.14           | NA   | NA             | NA   | NA            |
| gender          | female                         | 818         | 0.58 | <b>0.013</b>   | 0.61 | <b>0.028</b>   | 0.5  | 0.07          |
|                 | male                           | 1387        | 0.8  | <b>0.034</b>   | 0.75 | 0.14           | 0.43 | <b>0.0023</b> |
| Smoking history | exclude those never smoked     | 970         | 0.45 | <b>0.00021</b> | 1.3  | 0.27           | 0.51 | <b>0.0074</b> |
|                 | Only those never smoked        | 247         | 0.33 | <b>0.0042</b>  | 0.38 | <b>0.0014</b>  | 0.51 | 0.16          |
|                 | Yes                            | 178         | 0.35 | 0.11           | 0.51 | 0.21           | 0.21 | <b>0.045</b>  |
| AJCC stage t    | T1                             | 475         | 1.38 | 0.23           | 0.47 | 0.28           | NA   | 0.11          |
|                 | T2                             | 686         | 1.72 | <b>0.005</b>   | 0.72 | 0.38           | 0.59 | 0.19          |
| AJCC stage n    | N0                             | 863         | 0.74 | 0.09           | 0.41 | <b>0.04</b>    | 1.56 | 0.29          |
|                 | N1                             | 296         | 1.79 | 0.02           | 2.32 | 0.06           | 0.61 | 0.46          |
| AJCC stage m    | M0                             | 818         | 1.31 | 0.06           | 0.57 | 0.12           | 1.34 | 0.4           |
| surgery         | Only surgical margins negative | 730         | 0.26 | <b>0.00025</b> | 0.39 | <b>0.00061</b> | 0.41 | <b>0.017</b>  |

HR, hazard ratio; AJCC, American Joint Committee on Cancer; OS, overall survival; FP, first progression; PPS, post Progression survival; NA, not available data value less than 0.05 is shown in bold.

**Table S3.** Correlative subgroup analysis of HMGB1 expression and prognosis of ovarian cancer cases.

| FACTOR        | subgroup                | Sample size | OS   |               | PFS  |                | PPS  |              |
|---------------|-------------------------|-------------|------|---------------|------|----------------|------|--------------|
|               |                         |             | HR   | <i>p</i>      | HR   | <i>p</i>       | HR   | <i>p</i>     |
| Histology     | Endometrioid            | 62          | 0.56 | 0.61          | 1.97 | 0.24           | NA   | NA           |
|               | serous                  | 1232        | 1.3  | <b>0.024</b>  | 1.34 | <b>0.011</b>   | 1.25 | 0.088        |
| Stage         | Stage I                 | 107         | 0    | 0.071         | 0.29 | 0.097          | NA   | NA           |
|               | Stage II                | 72          | 0.22 | <b>0.049</b>  | 1.59 | 0.31           | 0.23 | 0.16         |
|               | Stage III               | 1079        | 1.38 | <b>0.012</b>  | 1.31 | <b>0.031</b>   | 1.23 | 0.13         |
|               | Stage IV                | 189         | 0.77 | 0.37          | 1.33 | 0.28           | 1.72 | 0.13         |
| TP53 mutation | Mutated                 | 516         | 1.27 | 0.26          | 1.89 | <b>0.00098</b> | 0.81 | 0.27         |
|               | Wild type               | 102         | 0.63 | 0.4           | 2.8  | <b>0.069</b>   | 0.72 | 0.54         |
| Debulk        | optimal                 | 802         | 1.35 | 0.17          | 1.3  | 0.13           | 0.75 | 0.24         |
|               | suboptimal              | 536         | 1.39 | <b>0.034</b>  | 1.55 | <b>0.0018</b>  | 1.3  | <b>0.094</b> |
| Grade         | Grade 1                 | 56          | 3.63 | <b>0.023</b>  | NA   | <b>0.038</b>   | NA   | NA           |
|               | Grade 2                 | 325         | 1.69 | <b>0.025</b>  | 1.45 | 0.062          | 0.63 | 0.077        |
|               | Grade 3                 | 1024        | 1.36 | <b>0.019</b>  | 1.32 | <b>0.028</b>   | 1.3  | 0.085        |
|               | Grade 4                 | 21          | 0.57 | 0.26          | NA   | NA             | NA   | NA           |
| Chemotherapy  | Contains platin         | 1438        | 1.47 | <b>0.0021</b> | 1.48 | <b>9.4e−05</b> | 1.25 | 0.067        |
|               | Contains Taxol          | 821         | 1.46 | <b>0.012</b>  | 1.51 | <b>0.0013</b>  | 1.33 | 0.061        |
|               | Contains Taxol + platin | 804         | 1.46 | <b>0.011</b>  | 1.51 | <b>0.0014</b>  | 1.34 | 0.057        |

HR, hazard ratio; OS, overall survival; PFS, progress free survival; PPS, post progression survival; TP53, Tumor Protein P53; NA, not available data; *p*-value less than 0.05 is shown in bold.

**Table S4.** Correlative subgroup analysis of HMGB1 expression and prognosis of gastric cancer cases.

| FACTOR                | subgroup            | Sample size | OS   |                | FP   |                | PPS  |                |
|-----------------------|---------------------|-------------|------|----------------|------|----------------|------|----------------|
|                       |                     |             | HR   | <i>p</i>       | HR   | <i>p</i>       | HR   | <i>p</i>       |
| Stage                 | Stage I             | 69          | 0.21 | <b>0.0054</b>  | 0.48 | 0.25           | 0.18 | <b>0.025</b>   |
|                       | Stage III           | 319         | 0.49 | <b>0.00019</b> | 0.52 | <b>0.00086</b> | 0.33 | <b>2.3e−07</b> |
| Gender                | female              | 244         | 0.53 | <b>0.0045</b>  | 0.51 | <b>0.0018</b>  | 0.46 | <b>0.009</b>   |
|                       | male                | 567         | 0.61 | <b>0.001</b>   | 0.71 | <b>0.019</b>   | 0.57 | <b>0.00082</b> |
| HER2                  | negative            | 641         | 0.67 | <b>0.0044</b>  | 0.8  | 0.12           | 0.59 | <b>0.0043</b>  |
|                       | positive            | 425         | 0.65 | 0.054          | 0.6  | <b>0.029</b>   | 0.5  | <b>0.0065</b>  |
| Differentiation       | Poorly              | 166         | 0.57 | <b>0.045</b>   | 0.5  | 0.0076         | 0.77 | 0.44           |
|                       | Moderately          | 67          | 0.45 | <b>0.033</b>   | 0.53 | 0.076          | 0.41 | 0.067          |
| stage t               | T2                  | 253         | 0.69 | <b>0.079</b>   | 0.67 | 0.068          | 0.67 | 0.077          |
|                       | T3                  | 208         | 0.58 | <b>0.0031</b>  | 0.66 | <b>0.022</b>   | 0.47 | <b>0.00015</b> |
| stage n               | N0                  | 76          | 0.42 | <b>0.045</b>   | 0.46 | 0.076          | 0.33 | <b>0.046</b>   |
|                       | N1                  | 232         | 0.54 | <b>0.0042</b>  | 0.62 | <b>0.02</b>    | 0.48 | <b>0.0016</b>  |
| stage m               | N2                  | 129         | 0.69 | 0.099          | 0.71 | 0.12           | 0.49 | <b>0.0059</b>  |
|                       | M0                  | 459         | 0.65 | <b>0.0023</b>  | 0.69 | <b>0.007</b>   | 0.61 | <b>0.0012</b>  |
| Lauren classification | M1                  | 58          | 1.38 | 0.32           | 1.64 | 0.12           | 0.48 | 0.051          |
|                       | Intestinal          | 336         | 0.52 | <b>0.00088</b> | 0.59 | <b>0.0061</b>  | 0.45 | <b>0.00021</b> |
| Treatment             | Diffuse             | 248         | 0.69 | <b>0.035</b>   | 0.73 | 0.075          | 0.7  | 0.067          |
|                       | Surgery alone       | 393         | 0.65 | <b>0.0037</b>  | 0.7  | <b>0.017</b>   | 0.54 | <b>0.00018</b> |
| Perforation           | 5-Fu based adjuvant | 158         | 0.5  | 0.13           | 0.59 | 0.21           | 0.36 | 0.055          |
|                       | No                  | 169         | 0.51 | <b>0.0037</b>  | 0.48 | <b>0.00062</b> | 0.72 | 0.24           |

HR, hazard ratio; OS, overall survival; FP, first progression; PPS, post progression survival; HER2, human epidermal growth factor receptor-2; NA, not available data; *p*-value less than 0.05 is shown in bold.

**Table S5.** Correlative subgroup analysis of HMGB1 expression and prognosis of liver cancer cases.

| FACTOR              | subgroup  | Sample size | OS   |              | PFS  |               | RFS  |               | DSS  |               |
|---------------------|-----------|-------------|------|--------------|------|---------------|------|---------------|------|---------------|
|                     |           |             | HR   | <i>p</i>     | HR   | <i>p</i>      | HR   | <i>p</i>      | HR   | <i>p</i>      |
| Race                | White     | 184         | 0.66 | 0.078        | 0.66 | <b>0.038</b>  | 0.71 | 0.15          | 0.61 | 0.086         |
|                     | Asian     | 158         | 0.7  | 0.27         | 1.47 | 0.16          | 1.37 | 0.23          | 1.99 | 0.085         |
| Stage               | Stage I   | 171         | 0.62 | 0.16         | 1.39 | 0.2           | 1.63 | 0.075         | 1.67 | 0.26          |
|                     | Stage II  | 86          | 0.72 | 0.42         | 1.41 | 0.29          | 1.39 | 0.33          | 2.06 | 0.19          |
|                     | Stage III | 85          | 0.74 | 0.34         | 0.64 | 0.12          | 0.61 | 0.16          | 0.76 | 0.51          |
| gender              | female    | 121         | 1.18 | 0.56         | 0.75 | 0.3           | 0.7  | 0.26          | 0.79 | 0.53          |
|                     | male      | 250         | 0.68 | 0.11         | 1.41 | 0.077         | 1.51 | 0.051         | 1.63 | 0.097         |
| Vascular invasion   | None      | 205         | 0.66 | 0.13         | 0.8  | 0.34          | 1.36 | 0.23          | 1.91 | 0.075         |
|                     | micro     | 93          | 0.39 | 0.073        | 1.35 | 0.32          | 1.77 | 0.17          | 0.19 | 0.078         |
| Grade               | Grade 1   | 55          | 1.89 | 0.18         | 1.97 | 0.095         | 2.08 | 0.14          | 2.7  | 0.091         |
|                     | Grade 2   | 177         | 0.5  | <b>0.012</b> | 0.67 | 0.086         | 0.67 | 0.12          | 0.39 | <b>0.0052</b> |
|                     | Grade 3   | 122         | 0.83 | 0.54         | 1.28 | 0.33          | 1.31 | 0.33          | 1.66 | 0.19          |
| Sorafenib treatment | treated   | 30          | 0.11 | <b>1e−04</b> | 0.33 | <b>0.0071</b> | 0.35 | <b>0.024</b>  | 0.11 | <b>1e−04</b>  |
| AJCC_T              | T1        | 181         | 0.58 | 0.085        | 1.36 | 0.22          | 1.59 | 0.085         | 0.63 | 0.26          |
|                     | T2        | 94          | 0.64 | 0.23         | 1.51 | 0.2           | 1.5  | 0.28          | 0.44 | 0.088         |
|                     | T3        | 80          | 1.38 | 0.32         | 0.57 | 0.057         | 0.59 | 0.11          | 0.81 | 0.59          |
| Alcohol consumption | Yes       | 117         | 0.61 | 0.14         | 0.41 | <b>0.0014</b> | 0.41 | <b>0.0051</b> | 0.51 | 0.075         |
|                     | none      | 205         | 1.57 | 0.07         | 1.4  | 0.098         | 1.4  | 0.14          | 2.09 | <b>0.02</b>   |
| Hepatitis virus     | yes       | 153         | 0.68 | 0.28         | 1.17 | 0.5           | 1.27 | 0.35          | 0.78 | 0.56          |
|                     | none      | 169         | 1.6  | 0.054        | 1.32 | 0.23          | 1.47 | 0.14          | 1.94 | <b>0.027</b>  |

HR, hazard ratio; AJCC, American Joint Committee on Cancer; OS, overall survival; FP, first progression; PPS, post progression survival; HER2, human epidermal growth factor receptor-2; NA, not available data; *p*-value less than 0.05 is shown in bold.

**Table S6.** Prediction of CPTAC-identified phosphorylation sites of HMGB1 based on the PhosphoNET.

| site        | sequence          | Experimentally confirmed <sup>#</sup> | Hydrophobicity | p-site similarity score | Maximum kinase specificity | Sum kinase specificity score | Conservation score |
|-------------|-------------------|---------------------------------------|----------------|-------------------------|----------------------------|------------------------------|--------------------|
| <b>T22</b>  | SYAFFVQTCREEHKK   | NA                                    | −1.033         | −63.8                   | 127                        | 3,943                        | 36.4               |
| <b>S35</b>  | KPRGKMSSYAFFVQT   | NA                                    | −0.633         | −61.3                   | 493                        | 17,057                       | 33.6               |
| <b>S39</b>  | PDASVNFSEFSKKCS   | NA                                    | −0.813         | −59.6                   | 356                        | 15,114                       | 20.6               |
| <b>S42</b>  | SVNFSEFSKKCSERW   | NA                                    | −1.187         | −63.0                   | 299                        | 12,824                       | 43.0               |
| <b>T78</b>  | YEREMKTYIPPKGET   | NA                                    | −1.600         | −57.8                   | 609                        | 26,836                       | 33.9               |
| <b>S100</b> | NAPKRPPSAFFLFCFCS | NA                                    | −0.107         | −60.6                   | 449                        | 20,166                       | 0.0                |
| <b>Y109</b> | FFLFCSEYRPKIKGE   | 20068231                              | −0.333         | −60.1                   | 349                        | 16,073                       | 18.8               |
| <b>S121</b> | KGEHPGLSIGDVAKK   | 20068231                              | −0.800         | −57.5                   | 320                        | 13,019                       | 37.0               |
| <b>Y162</b> | YEKDIAAYRAKGKPD   | 20068230                              | −1.427         | −56.9                   | 373                        | 16,381                       | 38.8               |

<sup>#</sup>The PMID (PubMed Unique Identifier) information of the publication was provided; NA, not available.

**Table S7.** The following primers were presented.

| Name  | Primer         | Sequence (5'–3')      |
|-------|----------------|-----------------------|
| HMGB1 | Forward Primer | TCTCAGGGCCAAACCGATAG  |
|       | Reverse Primer | TCGTGCACCGAAAGTTTCAA  |
| HMGB2 | Forward Primer | CCAGGCAAGAATACCCTCCA  |
|       | Reverse Primer | CCGCGAAATTGACGGAAGAG  |
| H2AFV | Forward Primer | GCCGCATCCACAGACACTT   |
|       | Reverse Primer | TACCTGCCAGCTCCAGCA    |
| CDK1  | Forward primer | CGTAGCTGGGCTCTGATTGG  |
|       | Reverse primer | TGGTAGATCCGCGCTAAAGG  |
| ACTB  | Forward primer | CACCATGGATGATGATATCGC |
|       | Reverse primer | CATAGGAATCCTTCTGACCCA |
